# Supplementary material for: Prioritisation of Candidate Genes Underpinning COVID-19 Host Genetic Traits Based on High-Resolution 3D Chromosomal Topology
Source: Front Genet. 2021 Oct 25;12:745672. doi: 10.3389/fgene.2021.745672 (PMC8573080; doi:10.3389/fgene.2021.745672)
Supplement: Supplementary file 2 [file Table3.XLSX]

## Sheet: A. HGI loci
Chr	Locus	SNP	SNP pos GRCh37	SNP pos GRCh38	Gene	Gene alias	Min TSS GRCh37	Max TSS GRCh37	Min TSS GRCh38	Max TSS GRCh38	ENSG ID	Prioritised in HGI	COGS score >0.3	Max COGS score
3	3p21.31	rs2271616	45838013	45796521					45842265	45842265	ENSG00000285788	NO	YES	0.443106
3	3p21.31	rs2271616	45838013	45796521	SLC6A20		45807262	45838027	45765770	45796536	ENSG00000163817	YES	YES	0.329234
3	3p21.31	rs2271616	45838013	45796521	CCR3		46205096	46306619	46130890	46265128	ENSG00000183625	YES	NO	0.0012843
3	3p21.31	rs10490770	45864732	45823240	LZTFL1		45870065	45957534	45828573	45916042	ENSG00000163818	YES	YES	0.722138
3	3p21.31	rs10490770	45864732	45823240					45842265	45842265	ENSG00000285788	NO	YES	0.443106
3	3p21.31	rs10490770	45864732	45823240	CXCR6		45982425	45986541	45940933	45945049	ENSG00000172215	YES	NO	0.131568
3	3q12.3	rs11919389	101424458	101705614	PDCL3P4		101431316	101431316	101712472	101712472	ENSG00000244119	NO	YES	0.31329
3	3q12.3	rs11919389	101424458	101705614	CEP97		101442769	101451455	101724593	101732611	ENSG00000182504	YES	NO	0.253706
3	3q12.3	rs11919389	101424458	101705614	NXPE3		101498046	101504244	101779202	101801860	ENSG00000144815	YES	NO	0.252552
3	3q12.3	rs11919389	101424458	101705614	ZBTB11		101378767	101396339	101659923	101677132	ENSG00000066422	YES	NO	0.251844
3	3q12.3	rs11919389	101424458	101705614	RPL24		101404733	101405626	101685889	101686718	ENSG00000114391	YES	NO	0.197177
6	6p21.1	rs1886814	41502683	41534945	FOXP4		41514164	41537912	41546381	41586795	ENSG00000137166	YES	YES	0.390328
6	6p21.1	rs1886814	41502683	41534945	FOXP4-AS1		41513812	41516359	41546074	41548621	ENSG00000234753	NO	YES	0.389579
8	8q24.13	rs72711165	125336564	124324323	TMEM65		125384933	125384933	124372701	124372701	ENSG00000164983	YES	NO	0.0308949
9	9q34.2	rs912805253	136149500	133274084	ABO		136150605	136150617	133252597	133276024	ENSG00000175164	YES	YES	1
12	12q24.13	rs10774671	113357193	112919388	OAS3		113376157	113407137	112938051	112968244	ENSG00000111331	YES	YES	0.80546
12	12q24.13	rs10774671	113357193	112919388	OAS1		113344582	113357291	112905856	112915551	ENSG00000089127	YES	YES	0.543661
12	12q24.13	rs10774671	113357193	112919388	DDX54		113599261	113623284	113161456	113185479	ENSG00000123064	NO	YES	0.468098
12	12q24.13	rs10774671	113357193	112919388	RITA1		113623331	113623347	113185526	113186936	ENSG00000139405	NO	YES	0.468098
12	12q24.13	rs10774671	113357193	112919388	Y_RNA		113616324	113616324	113178519	113178519	ENSG00000201208	NO	YES	0.468098
12	12q24.13	rs10774671	113357193	112919388	OAS2		113416200	113436050	112978395	113003305	ENSG00000111335	YES	NO	0.14815
17	17q21.31	rs1819040	44219831	46142465	LINC02210	MGC57346	43697694	43723037	45620328	45645671	ENSG00000204650	NO	YES	0.586041
17	17q21.31	rs1819040	44219831	46142465	MAPT-AS1		43922123	43972966	45844757	45895680	ENSG00000264589	NO	YES	0.523761
17	17q21.31	rs1819040	44219831	46142465	SPPL2C		43922256	43922256	45844881	45844881	ENSG00000185294	YES	YES	0.514303
17	17q21.31	rs1819040	44219831	46142465	FMNL1		43298811	43322693	45221444	45245326	ENSG00000184922	NO	YES	0.509173
17	17q21.31	rs1819040	44219831	46142465	FMNL1-DT		43297699	43299589	45220332	45222222	ENSG00000267121	NO	YES	0.50889
17	17q21.31	rs1819040	44219831	46142465	KANSL1		44109932	44302733	46032566	46225389	ENSG00000120071	YES	YES	0.353215
17	17q21.31	rs1819040	44219831	46142465	KANSL1-AS1		44270942	44273424	46193576	46196058	ENSG00000214401	NO	YES	0.330616
17	17q21.31	rs1819040	44219831	46142465	MAPT		43971748	44063025	45894527	45985659	ENSG00000186868	YES	NO	0.166425
17	17q21.31	rs1819040	44219831	46142465	CRHR1		43699267	43910504	45784280	45833138	ENSG00000120088	YES	NO	0.101515
17	17q21.31	rs1819040	44219831	46142465	STH		44076616	44076616	45999250	45999250	ENSG00000256762	YES	NO	0.0580219
17	17q21.31	rs1819040	44219831	46142465	LINC02210-CRHR1		43699274	43699292	45620344	45621926	ENSG00000263715	YES	NO	0.045722
17	17q21.31	rs1819040	44219831	46142465	NSF		44668035	44803922	46590669	46726556	ENSG00000073969	YES	NO	0.00613873
17	17q21.31	rs1819040	44219831	46142465	PLEKHM1		43517739	43568115	45440373	45490749	ENSG00000225190	YES	NO	0.00424661
17	17q21.31	rs1819040	44219831	46142465	ARHGAP27		43473274	43511787	45395908	45434421	ENSG00000159314	YES	NO	0.00423262
17	17q21.31	rs1819040	44219831	46142465	LRRC37A		44370099	44372497	46292733	46295131	ENSG00000176681	YES	NO	0.001297
17	17q21.31	rs1819040	44219831	46142465	ARL17B		44430248	44439130	46352882	46361797	ENSG00000228696	YES	NO	0.00071649
17	17q21.31	rs1819040	44219831	46142465	WNT3		44896126	44910520	46818692	46833154	ENSG00000108379	YES	NO	0.00022382
17	17q21.31	rs1819040	44219831	46142465	LRRC37A2		44588877	44624591	46511511	46547225	ENSG00000238083	YES	NO	0
17	17q21.31	rs1819040	44219831	46142465	ARL17A		44657017	44657088	46559304	46579691	ENSG00000185829	YES	NO	0
17	17q21.33	rs77534576	47940666	49863303	NXPH3		47653220	47655996	49575871	49578634	ENSG00000182575	NO	YES	0.69421
17	17q21.33	rs77534576	47940666	49863303	RP5-1029K10.2		47651426	47651426	49574064	49574064	ENSG00000249906	NO	YES	0.694196
17	17q21.33	rs77534576	47940666	49863303	SLC35B1		47780500	47786376	49703138	49709014	ENSG00000121073	NO	YES	0.693367
17	17q21.33	rs77534576	47940666	49863303	RP11-613C6.2		47785696	47785696	49708334	49708334	ENSG00000250751	NO	YES	0.692049
17	17q21.33	rs77534576	47940666	49863303	DLX3		48071067	48072588	49993703	49995224	ENSG00000064195	YES	YES	0.687845
17	17q21.33	rs77534576	47940666	49863303	RP11-1094H24.3		48074253	48074253	49996889	49996889	ENSG00000248172	NO	YES	0.687823
17	17q21.33	rs77534576	47940666	49863303	KAT7		47865917	47903364	49788648	49826002	ENSG00000136504	YES	YES	0.493157
17	17q21.33	rs77534576	47940666	49863303	FAM117A		47797256	47866542	49719894	49789180	ENSG00000121104	NO	YES	0.350623
17	17q21.33	rs77534576	47940666	49863303	RP5-1029K10.4		47655324	47655324	49567889	49577962	ENSG00000250310	NO	YES	0.342034
17	17q21.33	rs77534576	47940666	49863303	TAC4		47925379	47925379	49848017	49848017	ENSG00000176358	YES	YES	0.33861
17	17q21.33	rs77534576	47940666	49863303	RP11-304F15.3	FLJ45513	47923272	47923272	49845910	49845910	ENSG00000204584	YES	YES	0.33861
19	19p13.3	rs2109069	4719443	4719431	DPP9		4684822	4724685	4684810	4724673	ENSG00000142002	YES	YES	1
19	19p13.3	rs2109069	4719443	4719431	CTB-50L17.16		4458756	4471490	4458759	4471493	ENSG00000267011	NO	YES	1
19	19p13.3	rs2109069	4719443	4719431	HDGFL2		4472284	4499626	4472297	4499629	ENSG00000167674	NO	YES	1
19	19p13.3	rs2109069	4719443	4719431	AC011498.1		4477048	4477048			ENSG00000220693	NO	YES	1
19	19p13.3	rs2109069	4719443	4719431	UBXN6		4446617	4457819	4446620	4457794	ENSG00000167671	NO	YES	1
19	19p13.3	rs2109069	4719443	4719431	RN7SL528P		4466463	4466463			ENSG00000264407	NO	YES	1
19	19p13.3	rs2109069	4719443	4719431	SAFB2		5589031	5624057	5589020	5624046	ENSG00000130254	NO	YES	1
19	19p13.3	rs2109069	4719443	4719431	SAFB		5623046	5666667	5623035	5666656	ENSG00000160633	NO	YES	1
19	19p13.3	rs2109069	4719443	4719431	DPP9-AS1		4679294	4679294	4679282	4679282	ENSG00000205790	NO	YES	1
19	19p13.3	rs2109069	4719443	4719431	AC005783.1		4726391	4726391			ENSG00000266209	NO	YES	1
19	19p13.2	rs74956615	10427721	10317045	TYK2		10461961	10491352	10351285	10380572	ENSG00000105397	YES	YES	0.982705
19	19p13.2	rs74956615	10427721	10317045	CTD-2369P2.8		10399695	10399695	10289019	10289019	ENSG00000267607	NO	YES	0.710594
19	19p13.2	rs74956615	10427721	10317045	ICAM4		10397643	10397680	10286955	10287004	ENSG00000105371	YES	YES	0.710512
19	19p13.2	rs74956615	10427721	10317045	ICAM1		10381511	10393958	10271093	10283282	ENSG00000090339	YES	NO	0.145512
19	19p13.2	rs74956615	10427721	10317045	ZGLP1		10416287	10420556	10305611	10309880	ENSG00000220201	YES	NO	0.0375457
19	19p13.2	rs74956615	10427721	10317045	RAVER1		10431838	10444316	10321162	10333638	ENSG00000161847	YES	NO	0.0364593
19	19p13.2	rs74956615	10427721	10317045	FDX2		10426471	10426691	10315795	10316015	ENSG00000267673	YES	NO	0.0364319
19	19p13.2	rs74956615	10427721	10317045	ICAM3		10445399	10450499	10334723	10339661	ENSG00000076662	YES	NO	0.0350138
19	19p13.2	rs74956615	10427721	10317045	ICAM5		10400657	10402149	10289952	10291473	ENSG00000105376	YES	NO	0.0104265
19	19q13.33	rs4801778	49370609	48867352	BCAT2		49300800	49314286	48797543	48811029	ENSG00000105552	NO	YES	0.625561
19	19q13.33	rs4801778	49370609	48867352	FTL		49468558	49468558	48965309	48965309	ENSG00000087086	NO	YES	0.411835
19	19q13.33	rs4801778	49370609	48867352	PLEKHA4		49341571	49371889	48838314	48868617	ENSG00000105559	YES	NO	0.179868
19	19q13.33	rs4801778	49370609	48867352	HSD17B14		49318329	49339935	48815072	48836510	ENSG00000087076	YES	NO	0.142067
19	19q13.33	rs4801778	49370609	48867352	TULP2		49385382	49401990	48882125	48898744	ENSG00000104804	YES	NO	0.07238
19	19q13.33	rs4801778	49370609	48867352	PPP1R15A		49375649	49377575	48872421	48874318	ENSG00000087074	YES	NO	0.0279093
19	19q13.33	rs4801778	49370609	48867352	NUCB1		49403307	49422257	48900312	48919000	ENSG00000104805	YES	NO	0.00743965
21	21q22.11	rs13050728	34615210	33242905	IFNAR2		34602206	34621049	33205282	33248744	ENSG00000159110	YES	YES	0.999998
21	21q22.11	rs13050728	34615210	33242905	AP000295.9		34619079	34621020	33229892	33248715	ENSG00000249624	NO	YES	0.998309
21	21q22.11	rs13050728	34615210	33242905	IFNAR1		34696734	34697278	33324429	33325005	ENSG00000142166	NO	YES	0.906125
21	21q22.11	rs13050728	34615210	33242905	AP000302.58		34856565	34856565	33484258	33484258	ENSG00000231355	NO	YES	0.86315
21	21q22.11	rs13050728	34615210	33242905	LINC00649		35287838	35341820	33915534	33969519	ENSG00000237945	NO	YES	0.697422
21	21q22.11	rs13050728	34615210	33242905	MRPS6		35445524	35496253	34073224	34123953	ENSG00000243927	NO	YES	0.438459
21	21q22.11	rs13050728	34615210	33242905	SLC5A3		35445870	35445870	34073578	34073578	ENSG00000198743	NO	YES	0.438235
21	21q22.11	rs13050728	34615210	33242905	AP000320.7		35445892	35445892	34073592	34073592	ENSG00000272657	NO	YES	0.438235

## Sheet: B. Non-HGI loci
ENSG ID	Gene	Chr GRCh37	Min TSS GRCh37	Max TSS GRCh37	Chr GRCh38	Min TSS GRCh38	Max TSS GRCh38	Max COGS score
ENSG00000182873	PRKCZ-AS1	1	2115314	2115828	1	2183875	2184389	0.304106
ENSG00000162585	FAAP20	1	2125547	2144159	1	2194108	2212720	0.304455
ENSG00000234396	RP11-181G12.4	1	2143962	2143962	1	2212523	2212523	0.304369
ENSG00000116151	MORN1	1	2307317	2323146	1	2375878	2391707	0.713022
ENSG00000157916	RER1	1	2323267	2333390	1	2391775	2401951	0.861152
ENSG00000157911	PEX10	1	2341443	2345236	1	2410004	2413797	0.767138
ENSG00000157870	PRXL2B	1	2517930	2520033	1	2586491	2588594	0.304147
ENSG00000142606	MMEL1	1	2524117	2564481	1	2592678	2633016	0.30428
ENSG00000223745	CCDC18-AS1	1	93739140	93811582	1	93273583	93346025	0.39501
ENSG00000134215	VAV3	1	108216271	108507766	1	107673649	107965180	0.383761
ENSG00000230489	VAV3-AS1	1	108507065	108507065	1	107964443	107964443	0.381689
ENSG00000162777	DENND2D	1	111731950	111747157	1	111189328	111204535	0.87854
ENSG00000064886	CHI3L2	1	111743393	111781928	1	111200771	111239306	0.878341
ENSG00000116455	WDR77	1	111990154	111991998	1	111447532	111449256	0.877898
ENSG00000116459	ATP5PB	1	111991486	111992304	1	111448864	111449682	0.877891
ENSG00000143110	C1orf162	1	112016414	112017190	1	111473792	111474568	0.878023
ENSG00000215867	KRT18P57	1	112192166	112192166	1	111649544	111649544	0.877706
ENSG00000201028	RNU6-151P	1	112193159	112193159	1	111650537	111650537	0.877694
ENSG00000169241	SLC50A1	1	155107820	155110524	1	155135344	155138048	0.376168
ENSG00000163463	KRTCAP2	1	155145253	155145951	1	155172777	155173475	0.613408
ENSG00000163462	TRIM46	1	155145873	155147230	1	155173787	155174754	0.611131
ENSG00000273088	RP11-201K10.3	1	155159748	155159748	1	155187272	155187272	0.604129
ENSG00000185499	MUC1	1	155160243	155162707	1	155187767	155192916	0.616478
ENSG00000231064	THBS3-AS1	1	155166659	155170593	1	155195004	155200802	0.604129
ENSG00000169231	THBS3	1	155166233	155178842	1	155196442	155209051	0.879334
ENSG00000173171	MTX1	1	155178490	155182246	1	155208695	155212455	0.552997
ENSG00000176444	CLK2	1	155239154	155248282	1	155269363	155278491	0.604761
ENSG00000143630	HCN3	1	155247374	155258395	1	155277463	155288604	0.604767
ENSG00000154358	OBSCN	1	228395831	228540735	1	228208044	228374918	0.602808
ENSG00000252396	RN7SKP195	1	237284107	237284107	1	237120807	237120807	0.88054
ENSG00000269554	AL590822.2	1	2121237	2121237				0.3041
ENSG00000243558	RP11-181G12.5	1	2144013	2144013				0.304369
ENSG00000203301	AL590822.1	1	2145620	2145620				0.304374
ENSG00000271748	MIR92B	1	155164968	155164968				0.604129
ENSG00000260589	STAM-AS1	10	17685877	17685877	10	17643878	17643878	0.337735
ENSG00000136738	STAM	10	17686124	17736925	10	17644151	17694926	0.339003
ENSG00000151151	IPMK	10	60027694	60027694	10	58267894	58267894	0.340124
ENSG00000122873	CISD1	10	60028818	60033193	10	58269162	58273433	0.339829
ENSG00000108064	TFAM	10	60144782	60145364	10	58385345	58385604	0.306771
ENSG00000166224	SGPL1	10	72575717	72614463	10	70815948	70869186	0.333496
ENSG00000074319	TSG101	11	18503278	18548779	11	18481731	18526951	0.426514
ENSG00000179119	SPTY2D1	11	18655936	18656338	11	18634342	18634791	0.425282
ENSG00000257043	SRSF3P1	11	18686597	18686597	11	18665050	18665050	0.402186
ENSG00000184566	AC132216.1	11	33902189	33902189	11	33880643	33880643	0.326538
ENSG00000135372	NAT10	11	34127149	34168267	11	34105617	34146720	0.474426
ENSG00000166016	ABTB2	11	34264092	34379555	11	34242545	34358010	0.310437
ENSG00000121691	CAT	11	34460472	34492261	11	34438934	34470714	0.397404
ENSG00000109861	CTSC	11	88032923	88070955	11	88309363	88359684	0.450349
ENSG00000258345	RP11-603J24.6	12	56513723	56513723	12	56119939	56119939	0.3173
ENSG00000139613	SMARCC2	12	56568497	56583351	12	56174713	56189567	0.323143
ENSG00000258199	RP11-977G19.5	12	56584068	56584068	12	56190284	56190284	0.323133
ENSG00000181852	RNF41	12	56602328	56615717	12	56208544	56221933	0.313759
ENSG00000139579	NABP2	12	56615799	56618185	12	56222015	56224401	0.313994
ENSG00000135423	GLS2	12	56866256	56882198	12	56472472	56488414	0.315947
ENSG00000201579	RNU6-343P	12	56982302	56982302	12	56588518	56588518	0.607817
ENSG00000076108	BAZ2A	12	56995313	57030600	12	56601529	56636816	0.415382
ENSG00000075035	WSCD2	12	108523248	108620767	12	108129288	108226990	0.542882
ENSG00000132963	POMP	13	29233241	29233241	13	28659104	28659130	0.317429
ENSG00000123200	ZC3H13	13	46543805	46626894	13	46011555	46052759	0.495747
ENSG00000235903	CPB2-AS1	13	46626941	46627037	13	46052497	46097361	0.495494
ENSG00000068650	ATP11A	13	113344643	113534615	13	112690038	112880972	0.375186
ENSG00000126217	MCF2L	13	113548692	113749536	13	112894378	113095222	0.312779
ENSG00000234603	AL356740.1	13	113539551	113539551				0.475902
ENSG00000027075	PRKCH	14	61654277	62010080	14	61187559	61543362	0.349792
ENSG00000258989	RP11-47I22.4	14	61995846	61995846	14	61529128	61529128	0.344264
ENSG00000258926	RP11-47I22.1	14	62012005	62012005	14	61543486	61545484	0.346185
ENSG00000250548	LINC01303	14	62036912	62037371	14	61570194	61570653	0.346332
ENSG00000232774	RP11-47I22.3	14	62037258	62114138	14	61570405	61647420	0.346598
ENSG00000100644	HIF1A	14	62162231	62212323	14	61695513	61745605	0.349018
ENSG00000258777	HIF1A-AS1	14	62162541	62162541	14	61695823	61695823	0.345939
ENSG00000023608	SNAPC1	14	62229075	62229075	14	61762420	61762420	0.342702
ENSG00000205683	DPF3	14	73142479	73360809	14	72675771	72894101	0.406516
ENSG00000259535	RPL21P12	14	103614934	103614934	14	103148597	103148597	0.333778
ENSG00000198690	FAN1	15	31196055	31220627	15	30890559	30924484	0.523244
ENSG00000166912	MTMR10	15	31242539	31283810	15	30950336	30991628	0.67318
ENSG00000212526	RNU6-466P	15	31248553	31248553	15	30956350	30956350	0.401768
ENSG00000134160	TRPM1	15	31323535	31453476	15	31031332	31161273	0.525578
ENSG00000169926	KLF13	15	31619058	31685778	15	31326835	31393575	0.675719
ENSG00000156958	GALK2	15	49447853	49611879	15	49155656	49319682	0.40861
ENSG00000271819	RNU6-94P	15	50639726	50639726	15	50347529	50347529	0.302305
ENSG00000260776	RP11-114H24.2	15	78208143	78219188	15	77915801	77926846	0.447415
ENSG00000261244	RP11-114H24.7	15	78208864	78208864	15	77916522	77916522	0.31038
ENSG00000242066	RN7SL214P	15	78209324	78209324	15	77916982	77916982	0.306346
ENSG00000050820	BCAR1	16	75270401	75301951	16	75236503	75268053	0.384717
ENSG00000103187	COTL1	16	84610702	84651683	16	84577096	84618078	0.344159
ENSG00000103194	USP10	16	84733584	84801873	16	84699986	84768267	0.358962
ENSG00000153786	ZDHHC7	16	85010887	85045141	16	84977281	85011535	0.367644
ENSG00000135709	KIAA0513	16	85061375	85120520	16	85027751	85086914	0.51847
ENSG00000108953	YWHAE	17	1264588	1303672	17	1361294	1400222	0.604876
ENSG00000173918	C1QTNF1	17	77018896	77042983	17	79022814	79046901	0.755294
ENSG00000167280	ENGASE	17	77071021	77081372	17	79074824	79085290	0.756693
ENSG00000134504	KCTD1	18	24040840	24237365	18	26460876	26657401	0.810909
ENSG00000263677	RP11-17A19.2	18	24268075	24268075	18	26685954	26688111	0.809527
ENSG00000265369	PCAT18	18	24269493	24283602	18	26703638	26703638	0.809575
ENSG00000101489	CELF4	18	34833944	35146000	18	37253981	37565827	0.370627
ENSG00000099337	KCNK6	19	38810484	38810883	19	38319845	38320243	0.437723
ENSG00000099338	CATSPERG	19	38826415	38855531	19	38335775	38364891	0.438675
ENSG00000105053	VRK3	19	50484441	50529203	19	49981184	50025946	1
ENSG00000142528	ZNF473	19	50528971	50544349	19	50025714	50041092	1
ENSG00000131408	NR1H2	19	50832910	50881998	19	50329653	50378741	0.486815
ENSG00000131401	NAPSB	19	50837818	50848024	19	50334561	50344767	0.407995
ENSG00000131400	NAPSA	19	50862478	50869087	19	50359221	50365830	0.470054
ENSG00000269392	CTB-191K22.6	19	50872588	50872588	19	50369331	50369331	0.450574
ENSG00000062822	POLD1	19	50887461	50920210	19	50384204	50416953	0.438032
ENSG00000086967	MYBPC2	19	50936160	50967488	19	50432892	50464231	0.469831
ENSG00000142530	FAM71E1	19	50978742	50980010	19	50475485	50476848	0.641275
ENSG00000161671	EMC10	19	50979657	50984347	19	50476400	50481090	0.641281
ENSG00000268854	CTD-2545M3.2	19	50986608	50986608	19	50483351	50483351	0.449484
ENSG00000268518	CTD-2545M3.8	19	50990895	50990895	19	50487638	50487638	0.449489
ENSG00000161677	JOSD2	19	51011286	51014610	19	50508029	50511220	0.449495
ENSG00000213023	SYT3	19	51128547	51171651	19	50625290	50639881	0.441886
ENSG00000235034	C19orf81	19	51152702	51161753	19	50649445	50658496	0.440484
ENSG00000161681	SHANK1	19	51166426	51222707	19	50663169	50719802	0.441954
ENSG00000142511	GPR32	19	51273721	51273721	19	50770464	50770464	0.832723
ENSG00000261341	CTD-2568A17.1	19	51289374	51289467	19	50786117	50793142	0.439108
ENSG00000142513	ACP4	19	51293672	51293672	19	50790415	50790415	0.439135
ENSG00000268375	CTD-2568A17.8	19	51296841	51296841	19	50793584	50793584	0.439116
ENSG00000167747	C19orf48	19	51305506	51308186	19	50798910	50804929	0.682249
ENSG00000221381	SNORD88B	19	51302379	51302379	19	50799122	50799122	0.730787
ENSG00000221241	SNORD88A	19	51302789	51302789	19	50799532	50799532	0.730788
ENSG00000220988	SNORD88C	19	51305675	51305675	19	50802418	50802418	0.682224
ENSG00000180279	LINC01869	19	51320937	51321184	19	50808874	50817681	0.575272
ENSG00000167748	KLK1	19	51324105	51327043	19	50820849	50823787	0.57528
ENSG00000174562	KLK15	19	51330407	51340469	19	50827151	50837213	0.575274
ENSG00000267968	AC011523.2	19	51333786	51333786	19	50830530	50830530	0.575268
ENSG00000268581	SIGLEC18P	19	51623244	51623244	19	51119987	51119987	0.445173
ENSG00000129450	SIGLEC9	19	51628165	51630287	19	51124906	51127030	0.445183
ENSG00000168995	SIGLEC7	19	51645556	51650214	19	51142299	51146957	0.446821
ENSG00000267895	SIGLEC19P	19	51647083	51647083	19	51143826	51143826	0.446821
ENSG00000170954	ZNF415	19	53626902	53636330	19	53123649	53133077	0.352103
ENSG00000133247	KMT5C	19	55851221	55857441	19	55339853	55346073	0.440325
ENSG00000179922	ZNF784	19	56135932	56135967	19	55624566	55624566	0.439162
ENSG00000268913	AC026806.2	19	38822274	38822274				0.437678
ENSG00000264213	RN7SL324P	19	50900510	50900510				0.437216
ENSG00000267531	AC020922.1	19	55851254	55851254				0.440255
ENSG00000018699	TTC27	2	32853099	33002949	2	32628032	32777882	0.565192
ENSG00000152689	RASGRP3	2	33661391	33764718	2	33436324	33539651	0.58193
ENSG00000237133	RASGRP3-AS1	2	33788614	33788614	2	33563547	33563547	0.547223
ENSG00000119812	FAM98A	2	33811936	33824449	2	33586869	33599382	0.594437
ENSG00000115107	STEAP3	2	119981384	120002047	2	119223831	119223853	0.377069
ENSG00000236107	SCN1A-AS1	2	166813909	166938041	2	165957188	166171431	0.877129
ENSG00000159197	KCNE2	21	35736323	35736323	21	34364006	34364006	0.520397
ENSG00000225555	AP000320.6	21	35747647	35747647	21	34375364	34375364	0.520395
ENSG00000205670	SMIM11A	21	35747779	35747903	21	34375480	34376057	0.520395
ENSG00000236830	CBR3-AS1	21	37509683	37528615	21	36134006	36175815	0.317299
ENSG00000142197	DOP1B	21	37529080	37618599	21	36156782	36246301	0.318494
ENSG00000157152	SYN2	3	12045876	12203045	3	12004388	12161545	0.362908
ENSG00000173389	IQCF1	3	51937351	51937351	3	51903335	51903353	0.660424
ENSG00000251371	CTD-2318H23.1	5	4640844	4640844	5	4640731	4640731	0.320912
ENSG00000212305	RNU6-679P	5	12297616	12297616	5	12297504	12297504	0.535632
ENSG00000039139	DNAH5	5	13771391	13944652	5	13714862	14011818	0.575054
ENSG00000176788	BASP1	5	17065707	17217669	5	17065598	17217631	0.321475
ENSG00000215196	BASP1-AS1	5	17217156	17217156	5	17216182	17217047	0.321431
ENSG00000113594	LIFR	5	38489347	38608456	5	38489245	38608354	0.412623
ENSG00000011426	ANLN	7	36429415	36488548	7	36389821	36448939	0.699943
ENSG00000228735	GS1-18A18.2	7	54646487	54646487	7	54578794	54578794	0.988735
ENSG00000187391	MAGI2	7	77797290	79082890	7	78035016	79453667	0.62107
ENSG00000226230	AC007237.2	7	78115847	78115847	7	78486530	78486530	0.621248
ENSG00000091128	LAMB4	7	107677907	107770801	7	108037462	108130361	0.876111
ENSG00000064393	HIPK2	7	139421841	139477577	7	139717013	139777998	0.624248
ENSG00000059377	TBXAS1	7	139476850	139657380	7	139777051	139957581	0.623577
ENSG00000266391	AC074389.1	7	1820427	1820427				0.35491
ENSG00000201761	RNU6-336P	8	22291904	22291904	8	22434391	22434391	0.677206
ENSG00000120910	PPP3CC	8	22298332	22368421	8	22440819	22510908	0.677276
ENSG00000120913	PDLIM2	8	22435792	22446796	8	22578279	22589283	0.783647
ENSG00000248235	AC037459.4	8	22446787	22446837	8	22589274	22589324	0.58608
ENSG00000241852	C8orf58	8	22457114	22459516	8	22599599	22602003	0.58486
ENSG00000120889	TNFRSF10B	8	22885147	22926692	8	23027634	23069031	0.590927
ENSG00000246130	RP11-875O11.2	8	22925742	22925742	8	23068229	23068229	0.590272
ENSG00000253930	TNFRSF10A-AS1	8	23046792	23046792	8	23189279	23189279	0.592224
ENSG00000104689	TNFRSF10A	8	23054786	23082639	8	23197273	23225102	0.58564
ENSG00000246582	RP11-1149O23.3	8	23081984	23083147	8	23224471	23225634	0.585147
ENSG00000250714	RP11-1149O23.4	8	23088428	23088428	8	23230915	23230915	0.586012
ENSG00000254048	RP11-328K2.1	8	59905497	59905497	8	58992938	58992938	0.361485
ENSG00000147571	CRH	8	67090960	67090960	8	66178464	66178464	0.321516
ENSG00000104518	GSDMD	8	144635377	144644220	8	143553207	143562050	0.345595
ENSG00000204839	MROH6	8	144649281	144655141	8	143567111	143572772	0.345152
ENSG00000255050	RP11-661A12.9	8	144655660	144655660	8	143573490	143573490	0.345042
ENSG00000183309	ZNF623	8	144718183	144731954	8	143636019	143649660	0.350787
ENSG00000181135	ZNF707	8	144766622	144790221	8	143684452	143708051	0.341979
ENSG00000181097	LINC02878	8	144778324	144778324	8	143696154	143696154	0.341426
ENSG00000180900	SCRIB	8	144873712	144897549	8	143791542	143815773	0.445379
ENSG00000179950	PUF60	8	144900646	144912029	8	143818476	143829352	0.378908
ENSG00000252075	RNU7-109P	8	144728139	144728139				0.346427
ENSG00000214733	RP11-429J17.8	8	144871090	144871685				0.340443
ENSG00000216090	MIR937	8	144895212	144895212				0.340435
ENSG00000165119	HNRNPK	9	86585701	86595569	9	83970786	83980616	0.387563
ENSG00000178966	RMI1	9	86595626	86595713	9	83980798	83980805	0.384484
ENSG00000136810	TXN	9	113007396	113018920	9	110245116	110256507	0.327544
ENSG00000165124	SVEP1	9	113141658	113342160	9	110379378	110579880	0.422362
ENSG00000181634	TNFSF15	9	117554388	117568406	9	114792108	114806039	0.886591
ENSG00000106952	TNFSF8	9	117666588	117692697	9	114904308	114930595	0.918863
ENSG00000136869	TLR4	9	120466610	120470475	9	117704175	117708197	0.444251
ENSG00000201444	RNU6-1082P	9	120470380	120470380	9	117708102	117708102	0.444236
ENSG00000285940					18	37565281	37610698	0.322181
ENSG00000287863					13	46290300	46290300	0.485136
ENSG00000284586	MIR92B				1	155195177	155195177	0.547446
